# Supplementary material for: Genome-wide Identification, Characterization, and Expression Analysis of PHT1 Phosphate Transporters in Wheat
Source: PubMed Central journal article supplement (PMC5386973; doi:10.3389/fpls.2017.00543), 2017-04-11
Supplement: Presentation_1.pdf [file Presentation_1.pdf]

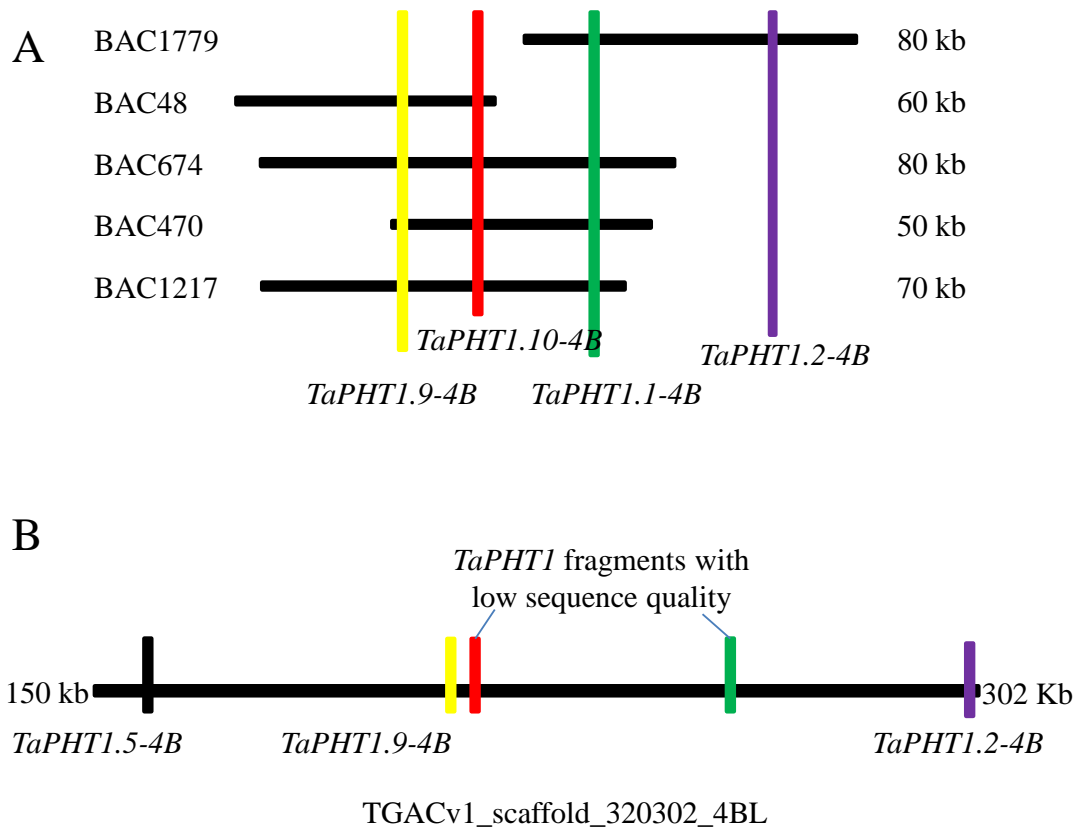

**Figure S1. *PHT1* location sites in BAC clones from Xiaoyan 54 (A) and the scaffold TGACv1\_scaffold\_320302\_4BL from Chinese spring (B).**

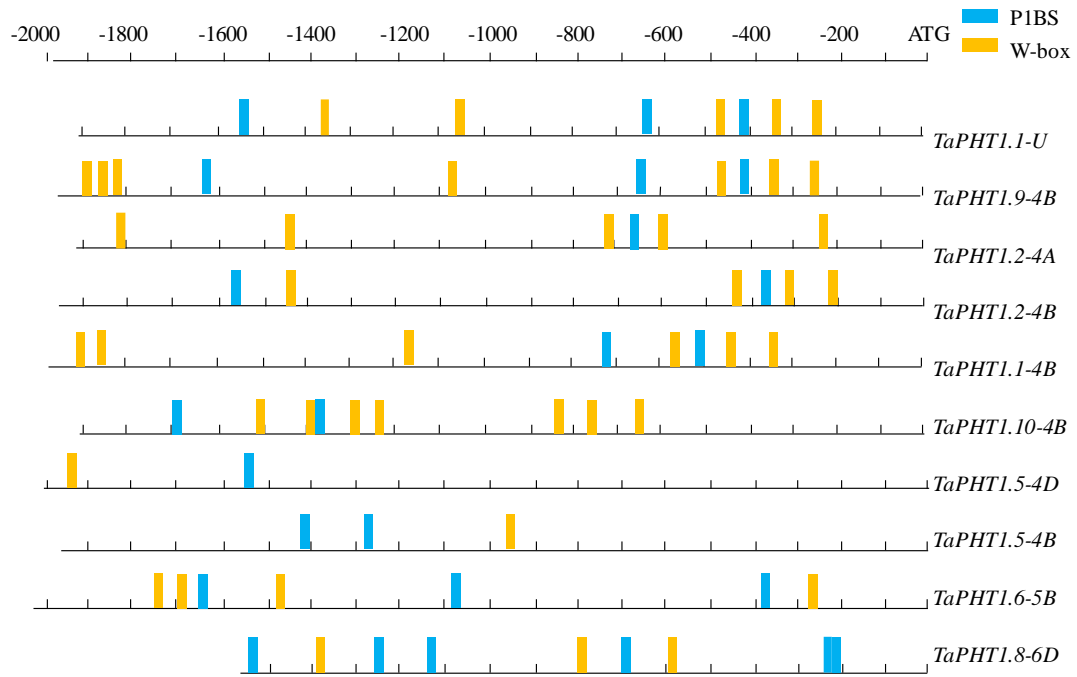

**Figure S2. The cis-acting elements in the promoters of *TaPHT1* genes.** P1BS, PHR1 binding element (GNATATNC); W-box, WRKY transcription factor binding element (TTGACY).

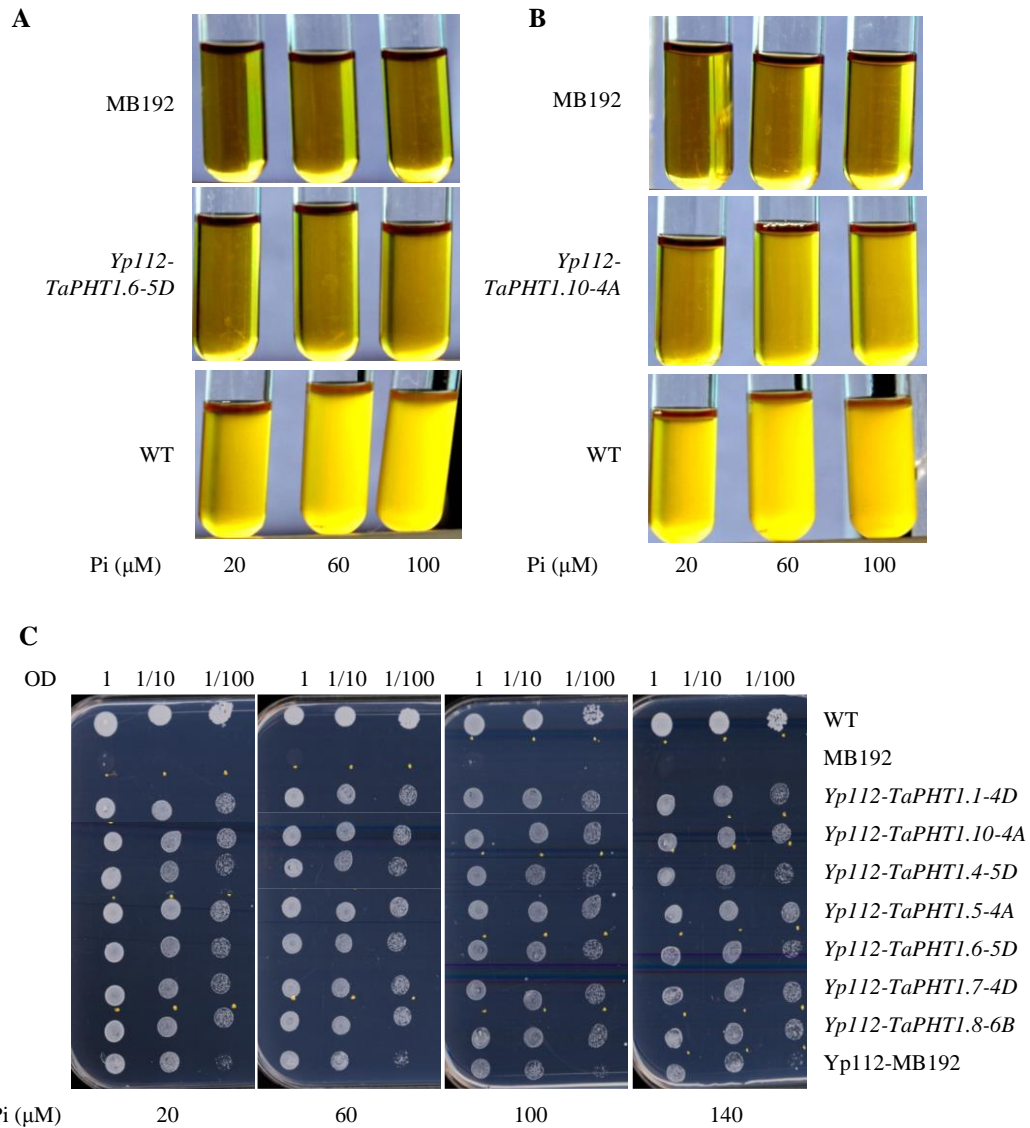

**Figure S3. Functional analysis of seven *TaPHT1* genes in yeast. (A and B)** Color shifts for acid phosphatase activity in the yeast strain MB192 (control), the wild type (WT), *Yp112-TaPHT1.6-5D* (A) and *Yp112-TaPHT1.10-4A* (B). The culture medium contains 20, 60, 100  $\mu\text{M}$  Pi. **(C)** Growth profiles of the wild-type (WT), MB192, MB192 transformed with an empty expression vector (*Yp112-MB192*) and the candidate *PHT1* genes (*Yp112-TaPHT1s*) on synthetic defined (SD) Ura mediums under 20, 60, 100, and 140  $\mu\text{M}$  Pi conditions. The plates were incubated at 30  $^{\circ}\text{C}$  for 3 d. Staining test for acid phosphatase activity was carried out according to the method described by Jia et al., 2011. Complementation of the *pho84* mutant MB192 by *TaPHT1* genes was according to the method described by Qin et al., 2012.

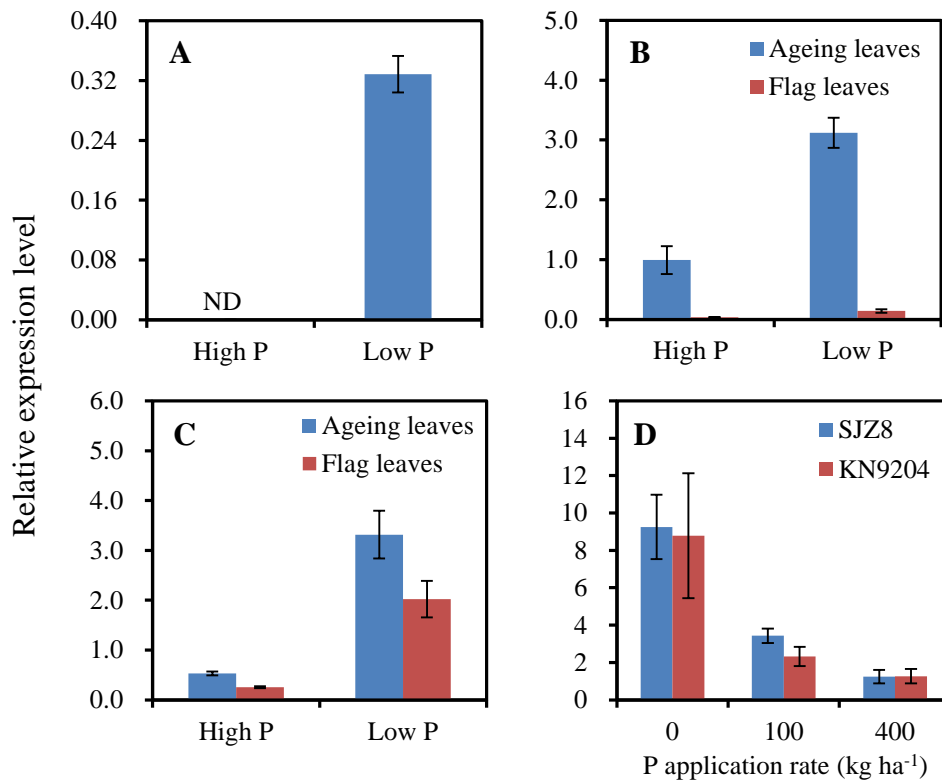

**Figure S4. Relative expression levels of *TaIPSt.1* under different P supply levels.**

(A) Expression of *TaIPSt.1* in the shoots of Xiaoyan 54 grown in high P and low P nutrient solutions in the hydroponic culture experiment at the seedling stage. ND, not detectable. (B and C) Expression of *TaIPSt.1* in leaves of Xiaoyan 54 grown in the high P and low P soils in the field experiment in Beijing at flowering (B) and grain filling stage (C). (D) Expression of *TaIPSt.1* in the roots of KN9204 and SJZ8 at the flowering stage under different P application rates in the 2011 field experiment in Quzhou. The gene expression levels were normalized to the internal control of *TaActin*. Data are mean  $\pm$  SE of three biological replications. Forward and reverse primers of *TaIPSt.1* were 5'-TCTCCTGTGAGTACCGGTGACA-3', and 5'-ACTGTACTAGTCGACAACCTTGC-3', respectively.

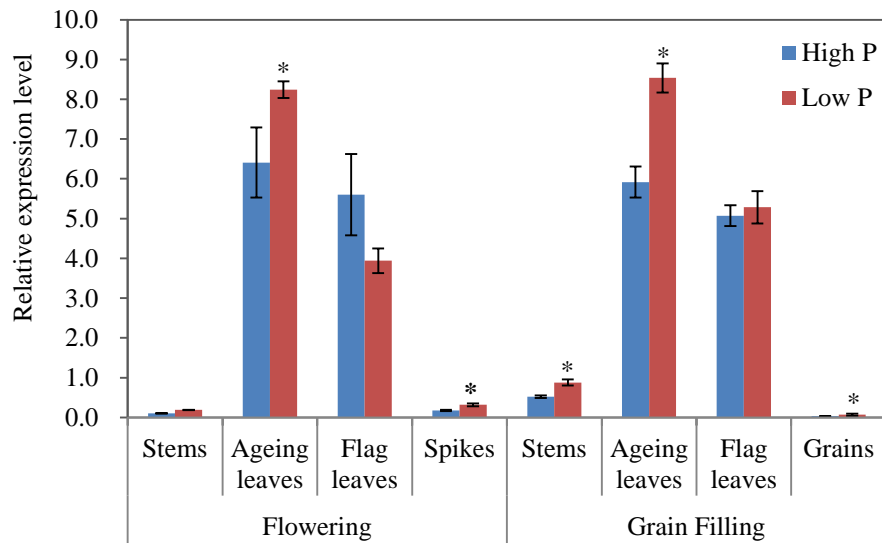

**Figure S5. Relative expression levels of *TaPHT1.6* in aerial parts in Xiaoyan 54 grown in the high P and low P soils in the field experiment in Beijing at flowering and grain filling stage.** The gene expression levels were normalized to the internal control of *TaActin*. Data are mean  $\pm$  SE of three biological replications. \* indicates significant differences between different P application rates ( $P < 0.05$ ).

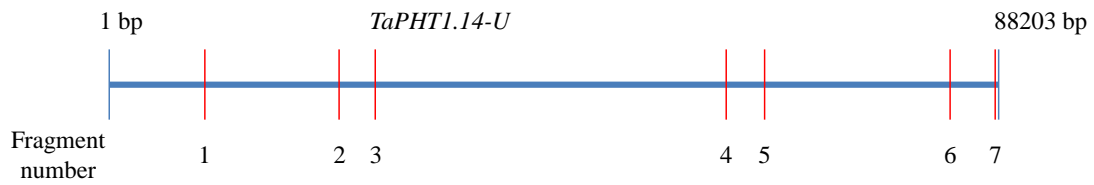

| Fragment number | scaffold position (bp) | <i>TaPHT1.14-U</i> position (bp) | Identity     |
|-----------------|------------------------|----------------------------------|--------------|
| 1               | 9482-10153             | 1-670                            | 643/672(96%) |
|                 | 10280-11216            | 668-1604                         | 916/937(98%) |
| 2               | 22959-23904            | 705-1650                         | 822/948(87%) |
| 3               | 26716-28516            | 1-1656                           | 100%         |
| 4               | 61672-62247            | 1081-1656                        | 546/576(95%) |
| 5               | 65518-66421            | 705-1616                         | 785/914(86%) |
| 6               | 84146-85092            | 705-1650                         | 820/949(86%) |
| 7               | 87654-88203            | 1-550                            | 546/550(99%) |

**Figure S6. Distribution of *TaPHT1.14-U* (1656 bp) like fragments in the Scaffold TGACv1\_scaffold\_642582\_U (88203 bp).** Red lines indicate the positions of the fragments highly similar with *TaPHT1.14-U*.

## References

- Jia, H., Ren, H., Gu, M., Zhao, J., Sun, S., Zhang, X., Chen, J., Wu, P., and Xu, G. (2011). The phosphate transporter gene *OsPht1;8* is involved in phosphate homeostasis in rice. *Plant Physiol* 156, 1164-1175.
- Qin, L., Guo, Y.X., Chen, L.Y., Liang, R.K., Gu, M.A., Xu, G.H., Zhao, J., Walk, T., and Liao, H. (2012). Functional characterization of 14 *Pht1* family genes in yeast and their expressions in response to nutrient starvation in soybean. *PloS one* 7, e47726.
