# Supplementary material for: Genome-wide Identification, Characterization, and Expression Analysis of PHT1 Phosphate Transporters in Wheat
Source: Front Plant Sci. 2017 Apr 11;8:543. doi: 10.3389/fpls.2017.00543 (PMC5386973; doi:10.3389/fpls.2017.00543)
Supplement: Supplementary file 2 [file Data_Sheet_1.XLSX]

## Sheet: Sheet1
Table S1. The primers used in the cloning of PHT1 genes in wheat
Primer name	Primer sequence (5¢-3¢)
PHT1Df1	GGCATGGGCTTCTTCAC	BAC screening
PHT1Dr1	GTCCTTCTGGAACAGGTTCTG	BAC screening
PHT1Df2	GACATCTTCTGCATCACCCT	BAC screening
PHT1Dr2	AAGACGCCGTAGTCCCTGT	BAC screening
PHT1.1/1.2/1.9/10-D1f	GAATTCATGGCGACTGAACAGCTCAAC	CDS cloning
PHT1.1/1.9-D1r	GCGGCCGCACACCAGCCTAAGCTTCGATGC	CDS cloning
PHT1.2-A1r	GCGGCCGCCTAGACACCAGTTGGGGCAATG	CDS cloning
PHT1.10-D2r	GCGGCCGCCTAGACACCAGTCGGAGCAATGG	CDS cloning
PHT1.3/4-Df	GAATTCATGGCGCGGTCGGAGCAGCAAG	CDS cloning
PHT1.3/4-Dr	GCGGCCGCCTAGGCCGTGGACGGCTGCACGG	CDS cloning
PHT1.5-A1f	GAATTCATGGCGAGCCGGCAGCTGCAGG	CDS cloning
PHT1.5-A1r	GCGGCCGCCATTCAAACCAGCTGCTCTC	CDS cloning
PHT1.6-D1f	GAATTCATGGCGCGCGAGCAGCTGGA	CDS cloning
PHT1.6-D1r	GCGGCCGCCTCACACGGGCACCGTCCTGG	CDS cloning
PHT1.7-D1f	GAATTCATGGCGGGCGACCAGGTGCACG	CDS cloning
PHT1.7-D1r	GCGGCCGCCTCACGCGACATCTCCTCCAATGACTTGC	CDS cloning
PHT1.8-B1f	GAATTCATGGCACGGCAGCAGCTGCA	CDS cloning
PHT1.8-B1r	GCGGCCGCTTCTACAAGGGAAGAACCTTGGAAT	CDS cloning
